# Supplementary material for: Human brown adipose tissue [15O]O2 PET imaging in the presence and absence of cold stimulus
Source: Springer Nature journal article supplement (doi:10.1007/s00259-016-3364-y), 2016-03-18
Supplement: MOESM1 [file 8220374]

## **Supplementary Data**

### **Human brown adipose tissue [ $^{15}\text{O}$ ]O<sub>2</sub> PET imaging in presence and absence of cold stimulus**

Mueez u Din, Juho Raiko, Teemu Saari, Nobu Kudomi, Tuula Tolvanen, Vesa Oikonen, Jarmo Teuvo, Hannu T Sipilä,

Nina Savisto, Riitta Parkkola, Pirjo Nuutila, Kirsi A. Virtanen

Corresponding author: Kirsi A. Virtanen, Ph: +358407626564, Fax: +35822318191, email: kirsi.virtanen@utu.fi

### **Methods**

#### *Production of tracers*

Low-energy deuteron accelerator Cyclone 3 (Ion Beam Application Inc., Louvain-la-Neuve, Belgium) was used for the production of [ $^{15}\text{O}$ ]O<sub>2</sub>. [ $^{15}\text{O}$ ] isotope was produced by the [ $^{14}\text{N}$ ] (d,n) [ $^{15}\text{O}$ ] nuclear reaction on natural nitrogen gas (1). Radiowater [ $^{15}\text{O}$ ]H<sub>2</sub>O was produced using Hidex Radiowater Generator (Hidex Oy, Turku, Finland). Production of [ $^{18}\text{F}$ ]FTHA has been described by Saari et al., (2).

#### *PET image reconstruction*

All quantitative corrections were applied to PET image data, including detector normalization, dead-time, radioactive decay, randoms, attenuation and scatter. Images were reconstructed using iterative 3D-OSEM (GE Vue Point HD-S) reconstruction using 24 subsets and 2 iterations. All images were filtered using 6.4 mm Gaussian post-filter. Due to the presence of large in-FOV and out-FOV activity in the first frames in the [ $^{15}\text{O}$ ]O<sub>2</sub> inhalation study, a clinically implemented scatter limit was applied (GE Quantitative Scatter Limit). The procedure is necessary to prevent scatter overestimation due to large in-FOV and out-FOV activity (3).

| Supplementary Table 1. |                                  |                                                                  |                           |                                     |
|------------------------|----------------------------------|------------------------------------------------------------------|---------------------------|-------------------------------------|
| Study Subject          | NEFA uptake rate (palmitic acid) | Energy Equivalent following complete circulatory NEFA oxidation* | DEE from MRO <sub>2</sub> | % of Energy from circulatory NEFA** |
|                        | μmol/100g/min                    | kcal/100g/day                                                    | kcal/100g/day             | percentage                          |
| 1                      | 0.43                             | 1.5                                                              | 7.9                       | 18.5                                |
| 2                      | 1.54                             | 5.2                                                              | 9.1                       | 57.0                                |
| 3                      | 0.59                             | 2.0                                                              | 7.2                       | 27.8                                |
| 4                      | 0.39                             | 1.3                                                              | 9.4                       | 14.5                                |
| 5                      | 3.91                             | 13.2                                                             | 9.0                       | 146.5                               |
| 6                      | 1.95                             | 6.6                                                              | 9.5                       | 68.9                                |
| 7                      | 0.39                             | 1.3                                                              | 4.3                       | 31.0                                |

\* Equation used for calculating energy equivalent  
*Energy Equivalent: palmitic acid (kcal/100g/day)*  
= NEFA uptake rate (μmol/100g/min)  
× 1440 (min/day) × 9.4 (kcal/g) × 256.42 × 10<sup>-6</sup> (g/μmol)

\*\* Assuming complete oxidation of palmitic acid ([<sup>18</sup>F]FTHA is palmitic acid based radiotracer)

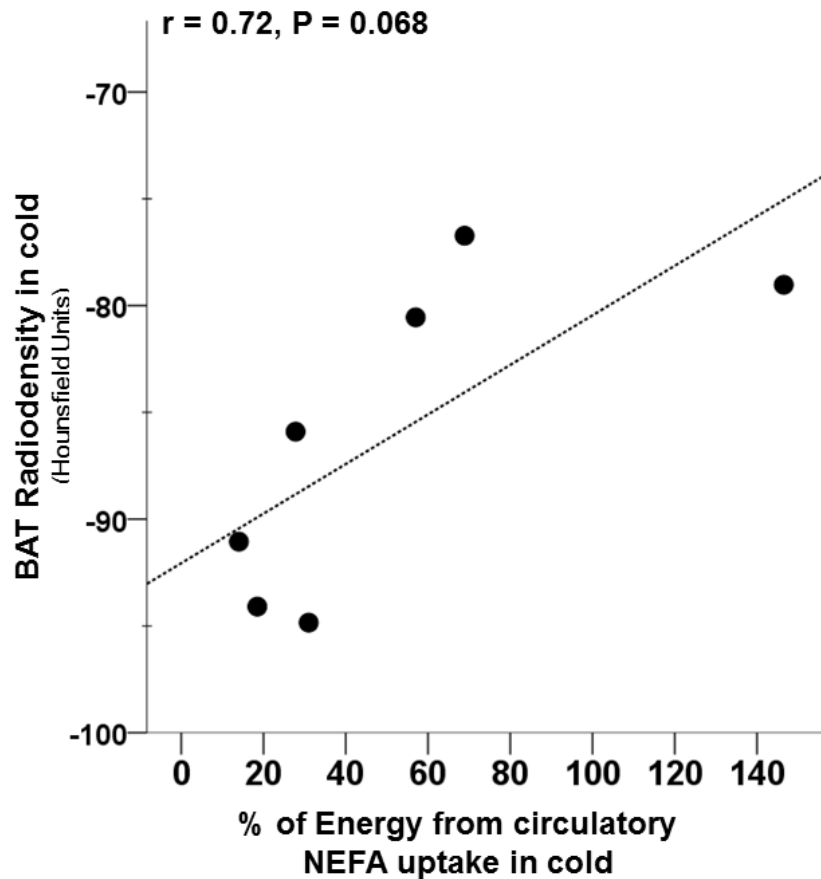

**Supplementary Fig. 1** BAT with less radiodensity (possessing more stored lipids) uses less contribution of circulatory NEFA as energy substrate and vice versa ( $r = 0.72$ ;  $p = 0.068$ ).

#### Reference List

- (1) Strijckmans K, Vandecasteele C, Sambre J. Production and quality control of  $^{15}\text{O}_2$  and  $\text{C}^{15}\text{O}_2$  for medical use. *Int J Appl Radiat Isot.* 1985;36(4):279-283.
- (2) Saari T. Impaired brown adipose tissue fatty acid metabolism in obese subjects [abstract]. *Diabetologia.* 2014;57(Suppl1).
- (3) Hori Y, Hirano Y, Koshino K et al. Validity of using a 3-dimensional PET scanner during inhalation of  $^{15}\text{O}$ -labeled oxygen for quantitative assessment of regional metabolic rate of oxygen in man. *Phys Med Biol.* 2014;59(18):5593-5609.
